# Supplementary material for: Cytotoxic T-Cell-Based Vaccine against SARS-CoV-2: A Hybrid Immunoinformatic Approach
Source: MDPI journal article supplement (doi:10.3390/vaccines10020218), 2022-01-30
Supplement: s1 [file s1]

**Supplementary data for the article “Cytotoxic T-cell-based vaccine against SARS-CoV2: a hybrid immunoinformatic approach” by Alexandru Tirziu and Virgil Paunescu.**

**Table S1.** Predictions for class I-restricted epitopes using NetMHCpan. For each peptide-HLA allele combination, the EL (eluting ligand) and BA (binding affinity) percentile rankings are given. A percentile ranking below 0.5% is considered a strong binder, while a percentile ranking below 2% is considered a weak binder.

| Number | Peptide    | HLA-A01:01 |         | HLA-A26:01 |         | HLA-A29:02 |         | HLA-B35:01 |         |
|--------|------------|------------|---------|------------|---------|------------|---------|------------|---------|
| 1      | WTAGAAAYY  | EL_Rank    | BA_Rank | EL_Rank    | BA_Rank | EL_Rank    | BA_Rank | EL_Rank    | BA_Rank |
|        |            | 0.0913     | 0.0166  | 0.0246     | 0.0075  | 0.1201     | 0.0261  | 0.6035     | 0.1907  |
| 2      | LTDEMIAQY  | HLA-A01:01 |         | HLA-A29:02 |         | HLA-B35:01 |         | HLA-C07:02 |         |
|        |            | EL_Rank    | BA_Rank | EL_Rank    | BA_Rank | EL_Rank    | BA_Rank | EL_Rank    | BA_Rank |
|        |            | 0.0014     | 0.0066  | 0.1849     | 0.5639  | 0.3419     | 0.5675  | 1.2973     | 3.0282  |
| 3      | ATSRTLSSYY | HLA-A01:01 |         | HLA-A11:01 |         | HLA-B57:01 |         |            |         |
|        |            | EL_Rank    | BA_Rank | EL_Rank    | BA_Rank | EL_Rank    | BA_Rank |            |         |
|        |            | 0.0521     | 0.041   | 0.2399     | 0.2605  | 0.6159     | 0.9269  |            |         |
| 4      | LPPAYTNSF  | HLA-B07:02 |         | HLA-B35:01 |         | HLA-B53:01 |         |            |         |
|        |            | EL_Rank    | BA_Rank | EL_Rank    | BA_Rank | EL_Rank    | BA_Rank |            |         |
|        |            | 0.4334     | 0.6093  | 0.0912     | 0.1476  | 0.1225     | 0.3326  |            |         |
| 5      | LSYFIASFR  | HLA-A11:01 |         | HLA-A31:01 |         | HLA-A68:01 |         |            |         |
|        |            | EL_Rank    | BA_Rank | EL_Rank    | BA_Rank | EL_Rank    | BA_Rank |            |         |
|        |            | 0.6634     | 0.1129  | 0.2249     | 0.0186  | 0.2393     | 0.009   |            |         |
| 6      | TSNQVAVLY  | HLA-A26:01 |         | HLA-B35:01 |         | HLA-B57:01 |         |            |         |
|        |            | EL_Rank    | BA_Rank | EL_Rank    | BA_Rank | EL_Rank    | BA_Rank |            |         |
|        |            | 0.2075     | 0.8458  | 0.2621     | 0.3837  | 0.5504     | 1.5585  |            |         |
| 7      | KTFPPTEPK  | HLA-A03:01 |         | HLA-A11:01 |         | HLA-A68:01 |         |            |         |
|        |            | EL_Rank    | BA_Rank | EL_Rank    | BA_Rank | EL_Rank    | BA_Rank |            |         |
|        |            | 0.004      | 0.0548  | 0.0023     | 0.0212  | 0.2422     | 0.8989  |            |         |
| 8      | VASQSIIAY  | HLA-A29:02 |         | HLA-B15:01 |         | HLA-B35:01 |         |            |         |
|        |            | EL_Rank    | BA_Rank | EL_Rank    | BA_Rank | EL_Rank    | BA_Rank |            |         |
|        |            | 0.2279     | 0.759   | 0.1156     | 0.592   | 0.018      | 0.0263  |            |         |
| 9      | GVYFASTEK  | HLA-A03:01 |         | HLA-A11:01 |         | HLA-A68:01 |         |            |         |
|        |            | EL_Rank    | BA_Rank | EL_Rank    | BA_Rank | EL_Rank    | BA_Rank |            |         |
|        |            | 0.0337     | 0.0539  | 0.0242     | 0.0265  | 0.793      | 0.9521  |            |         |
| 10     | RLFRKSNLK  | HLA-A03:01 |         | HLA-A11:01 |         | HLA-A31:01 |         |            |         |
|        |            | EL_Rank    | BA_Rank | EL_Rank    | BA_Rank | EL_Rank    | BA_Rank |            |         |
|        |            | 0.006      | 0.0078  | 0.1843     | 0.1475  | 0.34       | 0.2274  |            |         |
| 11     | TISLAGSYK  | HLA-A03:01 |         | HLA-A11:01 |         | HLA-A68:01 |         |            |         |
|        |            | EL_Rank    | BA_Rank | EL_Rank    | BA_Rank | EL_Rank    | BA_Rank |            |         |
|        |            | 0.3619     | 0.1972  | 0.1763     | 0.0678  | 0.534      | 0.204   |            |         |
| 12     | LPFNDGVYF  | HLA-B07:02 |         | HLA-B35:01 |         | HLA-B51:01 |         |            |         |
|        |            | EL_Rank    | BA_Rank | EL_Rank    | BA_Rank | EL_Rank    | BA_Rank |            |         |
|        |            | 0.6256     | 1.1603  | 0.0145     | 0.0108  | 0.199      | 0.1041  |            |         |
| 13     | AEIRASANL  | HLA-B40:01 |         | HLA-B44:02 |         | HLA-B44:03 |         |            |         |
|        |            | EL_Rank    | BA_Rank | EL_Rank    | BA_Rank | EL_Rank    | BA_Rank |            |         |
|        |            | 0.0272     | 0.0147  | 0.1568     | 0.1003  | 0.1479     | 0.1147  |            |         |
| 14     | CVADYSVLY  | HLA-A03:01 |         | HLA-A11:01 |         | HLA-A68:01 |         |            |         |

|    |           | EL_Rank    | BA_Rank | EL_Rank    | BA_Rank | EL_Rank | BA_Rank |
|----|-----------|------------|---------|------------|---------|---------|---------|
|    |           | 0.0321     | 0.0164  | 0.0287     | 0.0146  | 0.5368  | 0.5148  |
|    |           | HLA-A26:01 |         | HLA-A68:01 |         |         |         |
| 15 | NSFTRGVYY | EL_Rank    | BA_Rank | EL_Rank    | BA_Rank |         |         |
|    |           | 0.1743     | 0.3832  | 0.9916     | 1.2382  |         |         |

**Table S2.** Predictions for class II-restricted epitopes using NetMHCIIpan. For each peptide-HLA allele combination, the percentile rankings are given. A percentile ranking below 2% is considered a strong binder, while a percentile ranking below 10% is considered a weak binder.

| Number | Peptide         |                           |         |                |         |                |         |      |         |
|--------|-----------------|---------------------------|---------|----------------|---------|----------------|---------|------|---------|
| 1      | SYYKLGASQRVAGDS | HLA-DQA1*05:01-DQB1*03:01 |         | HLA-DRB1*01:01 |         | HLA-DRB1*07:01 |         |      |         |
|        |                 | Rank                      | Rank_BA | Rank           | Rank_BA | Rank           | Rank_BA | Rank | Rank_BA |
|        |                 | 1.74                      | 2.43    | 1.22           | 0.21    | 1.76           | 1.64    |      |         |
| 2      | PINLVRDLPQGFSAL | HLA-DRB1*03:01            |         |                |         |                |         |      |         |
|        |                 | Rank                      | Rank_BA |                |         |                |         |      |         |
|        |                 | 1.45                      | 0.07    |                |         |                |         |      |         |
| 3      | SRTLSYYKLGASQRV | HLA-DRB5*01:01            |         | HLA-DRB5*01:02 |         |                |         |      |         |
|        |                 | Rank                      | Rank_BA | Rank           | Rank_BA |                |         |      |         |
|        |                 | 0.57                      | 0.22    | 0.63           | 0.23    |                |         |      |         |
| 4      | ITRFQTLLALHRSYL | HLA-DRB1*01:01            |         |                |         |                |         |      |         |
|        |                 | Rank                      | Rank_BA |                |         |                |         |      |         |
|        |                 | 6.24                      | 0.87    |                |         |                |         |      |         |

**Table S3.** Candidate synthetic long peptides and their corresponding Vaxijen score, instability index (II) and molecular weight (Mol wt).

| Sequence                       | Vaxijen score | Conclusion       | II        | Mol wt (g/mol) |
|--------------------------------|---------------|------------------|-----------|----------------|
| PINLVRDLPQGFSALLSVGGAEIRASANL  | 0.69          | Probable ANTIGEN | 32.57     | 3092.547       |
| PINLVRDLPQGFSALLSVGGATSRTLSYY  | 0.6754        | Probable ANTIGEN | 25.833333 | 3209.648       |
| PINLVRDLPQGFSALLSVGGTISLAGSYK  | 0.6082        | Probable ANTIGEN | 14.386667 | 3087.567       |
| PINLVRDLPQGFSALLSVGGKTFPPTEPK  | 0.6064        | Probable ANTIGEN | 33.3      | 3192.704       |
| PINLVRDLPQGFSALLSVGGTSNQVAVLY  | 0.5993        | Probable ANTIGEN | 15.933333 | 3142.602       |
| ITRFQTLLALHRSYLLSVGGATSRTLSYY  | 0.5852        | Probable ANTIGEN | 30.263333 | 3401.909       |
| ITRFQTLLALHRSYLLSVGGAEIRASAN   | 0.5733        | Probable ANTIGEN | 16.9      | 3171.65        |
| SRTLSYYKLGASQRVLLSVGGTISLAGSYK | 0.5715        | Probable ANTIGEN | 21.276667 | 3176.62        |
| SRTLSYYKLGASQRVLLSVGGKTFPPTEPK | 0.5698        | Probable ANTIGEN | 29.946667 | 3281.758       |
| SRTLSYYKLGASQRVLLSVGGTSNQVAVLY | 0.5626        | Probable ANTIGEN | 17.74     | 3231.656       |
| PINLVRDLPQGFSALLSVGGVASQSIIAY  | 0.5599        | Probable ANTIGEN | 34.116667 | 3099.577       |
| SRTLSYYKLGASQRVLLSVGGLPFNDGVYF | 0.541         | Probable ANTIGEN | 23.79     | 3308.738       |
| PINLVRDLPQGFSALLSVGGGVYFASTEK  | 0.5304        | Probable ANTIGEN | 19.413333 | 3149.593       |
| SRTLSYYKLGASQRVLLSVGGVASQSIIAY | 0.5232        | Probable ANTIGEN | 35.21     | 3188.631       |
| SYYKLGASQRVAGDSL SVGGAEIRASANL | 0.521         | Probable ANTIGEN | 22.63     | 3054.37        |
| ITRFQTLLALHRSYLLSVGGTISLAGSYK  | 0.518         | Probable ANTIGEN | 18.183333 | 3279.828       |
| ITRFQTLLALHRSYLLSVGGKTFPPTEPK  | 0.5163        | Probable ANTIGEN | 22.243333 | 3384.965       |
| ITRFQTLLALHRSYLLSVGGTSNQVAVLY  | 0.5091        | Probable ANTIGEN | 19.73     | 3334.863       |
| SYYKLGASQRVAGDSL SVGGATSRTLSYY | 0.5064        | Probable ANTIGEN | 19.73     | 3171.471       |
| PINLVRDLPQGFSALLSVGGLPPAYTNSF  | 0.496         | Probable ANTIGEN | 29.946667 | 3157.615       |
| SRTLSYYKLGASQRVLLSVGGRLFRKSNLK | 0.4954        | Probable ANTIGEN | 35.923333 | 3398.957       |

|                                 |        |                  |           |          |
|---------------------------------|--------|------------------|-----------|----------|
| SRTLSYYKLGASQRVLLSVGGGVYFASTEK  | 0.4937 | Probable ANTIGEN | 30.263333 | 3238.647 |
| ITRFQTLLALHRSYLLLSVGGLPFNDGVYF  | 0.4875 | Probable ANTIGEN | 20.253333 | 3411.945 |
| PINLVRDLPQGFSALLLSVGGLTDEMIAQY  | 0.4778 | Probable ANTIGEN | 31.493333 | 3231.715 |
| PINLVRDLPQGFSALLLSVGGLSYFIASFR  | 0.4777 | Probable ANTIGEN | 20.96     | 3251.773 |
| ITRFQTLLALHRSYLLLSVGGVASQSIIAY  | 0.4697 | Probable ANTIGEN | 18.446667 | 3291.838 |
| SRTLSYYKLGASQRVLLSVGGGLPPAYTNSF | 0.4593 | Probable ANTIGEN | 25.833333 | 3246.669 |
| ITRFQTLLALHRSYLLLSVGGLRFRKSNLK  | 0.4419 | Probable ANTIGEN | 16.9      | 3502.164 |
| SRTLSYYKLGASQRVLLSVGGGLTDEMIAQY | 0.4411 | Probable ANTIGEN | 31.81     | 3320.769 |
| SRTLSYYKLGASQRVLLSVGGGLSYFIASFR | 0.441  | Probable ANTIGEN | 22.766667 | 3340.826 |
| ITRFQTLLALHRSYLLLSVGGGVYFASTEK  | 0.4402 | Probable ANTIGEN | 22.63     | 3341.854 |
| SYKLGASQRVAGDSLLSVGGTISLAGSYK   | 0.4392 | Probable ANTIGEN | 23.083333 | 3049.39  |
| SYKLGASQRVAGDSLLSVGGKTFPPTEPK   | 0.4375 | Probable ANTIGEN | 14.386667 | 3154.527 |
| PINLVRDLPQGFSALLLSVGWTAGAAAYY   | 0.4142 | Probable ANTIGEN | 27.38     | 3121.542 |
| SYKLGASQRVAGDSLLSVGGLPFNDGVYF   | 0.4087 | Probable ANTIGEN | 25.596667 | 3181.507 |
| ITRFQTLLALHRSYLLLSVGGLPPAYTNSF  | 0.4058 | Probable ANTIGEN | 18.183333 | 3349.876 |

**Table S4.** Predicted synthetic long peptide (SLPs) sequences, toxicity and allergenicity prediction. Toxicity prediction was performed using ToxinPred webserver, while allergenicity was predicted using AllerCatPro.

| Peptide sequence                | SVM score | Conclusion | Allergenicity                                |
|---------------------------------|-----------|------------|----------------------------------------------|
| PINLVRDLPQGFSALLLSVGGAEIRASANL  | -1.15     | Non-Toxin  | No significant hit (E-value threshold 0.001) |
| PINLVRDLPQGFSALLLSVGGATSRTLSYY  | -1.47     | Non-Toxin  | No significant hit (E-value threshold 0.001) |
| PINLVRDLPQGFSALLLSVGGTISLAGSYK  | -1.34     | Non-Toxin  | No significant hit (E-value threshold 0.001) |
| PINLVRDLPQGFSALLLSVGGKTFPPTEPK  | -1.21     | Non-Toxin  | No significant hit (E-value threshold 0.001) |
| PINLVRDLPQGFSALLLSVGGTSNQVAVLY  | -1.63     | Non-Toxin  | No significant hit (E-value threshold 0.001) |
| ITRFQTLLALHRSYLLLSVGGATSRTLSYY  | -1.25     | Non-Toxin  | No significant hit (E-value threshold 0.001) |
| ITRFQTLLALHRSYLLLSVGGAEIRASAN   | -1.03     | Non-Toxin  | No significant hit (E-value threshold 0.001) |
| SRTLSYYKLGASQRVLLSVGGTISLAGSYK  | -1.25     | Non-Toxin  | No significant hit (E-value threshold 0.001) |
| SRTLSYYKLGASQRVLLSVGGKTFPPTEPK  | -1.15     | Non-Toxin  | No significant hit (E-value threshold 0.001) |
| SRTLSYYKLGASQRVLLSVGGTSNQVAVLY  | -1.47     | Non-Toxin  | No significant hit (E-value threshold 0.001) |
| PINLVRDLPQGFSALLLSVGGVASQSIIAY  | -1.51     | Non-Toxin  | No significant hit (E-value threshold 0.001) |
| SRTLSYYKLGASQRVLLSVGGLPFNDGVYF  | -1.42     | Non-Toxin  | No significant hit (E-value threshold 0.001) |
| PINLVRDLPQGFSALLLSVGGGVYFASTEK  | -1.65     | Non-Toxin  | No significant hit (E-value threshold 0.001) |
| SRTLSYYKLGASQRVLLSVGGVASQSIIAY  | -1.45     | Non-Toxin  | No significant hit (E-value threshold 0.001) |
| SYKLGASQRVAGDSLLSVGGAEIRASANL   | -0.99     | Non-Toxin  | No significant hit (E-value threshold 0.001) |
| ITRFQTLLALHRSYLLLSVGGTISLAGSYK  | -1.15     | Non-Toxin  | No significant hit (E-value threshold 0.001) |
| ITRFQTLLALHRSYLLLSVGGKTFPPTEPK  | -1.11     | Non-Toxin  | No significant hit (E-value threshold 0.001) |
| ITRFQTLLALHRSYLLLSVGGTSNQVAVLY  | -1.4      | Non-Toxin  | No significant hit (E-value threshold 0.001) |
| SYKLGASQRVAGDSLLSVGGATSRTLSYY   | -1.25     | Non-Toxin  | No significant hit (E-value threshold 0.001) |
| PINLVRDLPQGFSALLLSVGGLPPAYTNSF  | -1.23     | Non-Toxin  | No significant hit (E-value threshold 0.001) |
| SRTLSYYKLGASQRVLLSVGGRLFRKSNLK  | -1.39     | Non-Toxin  | No significant hit (E-value threshold 0.001) |
| SRTLSYYKLGASQRVLLSVGGGVYFASTEK  | -1.64     | Non-Toxin  | No significant hit (E-value threshold 0.001) |
| ITRFQTLLALHRSYLLLSVGGLPFNDGVYF  | -1.4      | Non-Toxin  | No significant hit (E-value threshold 0.001) |
| PINLVRDLPQGFSALLLSVGGLTDEMIAQY  | -1.1      | Non-Toxin  | No significant hit (E-value threshold 0.001) |
| PINLVRDLPQGFSALLLSVGGLSYFIASFR  | -1.47     | Non-Toxin  | No significant hit (E-value threshold 0.001) |
| ITRFQTLLALHRSYLLLSVGGVASQSIIAY  | -1.37     | Non-Toxin  | No significant hit (E-value threshold 0.001) |
| SRTLSYYKLGASQRVLLSVGGGLPPAYTNSF | -1.2      | Non-Toxin  | No significant hit (E-value threshold 0.001) |
| ITRFQTLLALHRSYLLLSVGGLRFRKSNLK  | -1.28     | Non-Toxin  | No significant hit (E-value threshold 0.001) |

|                                 |       |           |                                              |
|---------------------------------|-------|-----------|----------------------------------------------|
| SRTLSEYKLGASQRVLLSVGGGLTDEMIAQY | -1    | Non-Toxin | No significant hit (E-value threshold 0.001) |
| SRTLSEYKLGASQRVLLSVGGGLSYFIASFR | -1.4  | Non-Toxin | No significant hit (E-value threshold 0.001) |
| ITRFQTLLALHRSYLLLSVGGGVYFASTEK  | -1.49 | Non-Toxin | No significant hit (E-value threshold 0.001) |
| SEYKLGASQRVAGDSLSSVGGTISLAGSYK  | -1.02 | Non-Toxin | No significant hit (E-value threshold 0.001) |
| SEYKLGASQRVAGDSLSSVGGKTFPPTEPK  | -1.03 | Non-Toxin | No significant hit (E-value threshold 0.001) |
| PINLVRDLPQGFSALLLSVGGWTAGAAAYY  | -1.53 | Non-Toxin | No significant hit (E-value threshold 0.001) |
| SEYKLGASQRVAGDSLSSVGGGLPFNDGVYF | -1.31 | Non-Toxin | No significant hit (E-value threshold 0.001) |
| ITRFQTLLALHRSYLLLSVGGGLPPAYTNSF | -1.2  | Non-Toxin | No significant hit (E-value threshold 0.001) |

**Table S5.** Synthetic long peptide sequences and their best Rosetta score. MFR – most favourable regions; AAR – additional allowed regions.

| Number | Peptide sequence                | Residues in MFR (%) | Residues in AAR (%) | Rosetta score |
|--------|---------------------------------|---------------------|---------------------|---------------|
| 1      | PINLVRDLPQGFSALLLSVGGAEIRASANL  | 100                 | 0                   | -66.335       |
| 2      | PINLVRDLPQGFSALLLSVGGATSRTLSEY  | 100                 | 0                   | -61.426       |
| 3      | PINLVRDLPQGFSALLLSVGGTISLAGSYK  | 91.3                | 8.7                 | -65.283       |
| 4      | PINLVRDLPQGFSALLLSVGGKTFPPTEPK  | 100                 | 0                   | -64.665       |
| 5      | PINLVRDLPQGFSALLLSVGGTSNQVAVLY  | 100                 | 0                   | -67.906       |
| 6      | ITRFQTLLALHRSYLLLSVGGATSRTLSEY  | 92.3                | 7.7                 | -52.653       |
| 7      | ITRFQTLLALHRSYLLLSVGGAEIRASAN   | 96.2                | 3.8                 | -63.795       |
| 8      | SRTLSEYKLGASQRVLLSVGGTISLAGSYK  | 95.8                | 4.2                 | -69.309       |
| 9      | SRTLSEYKLGASQRVLLSVGGKTFPPTEPK  | 95.5                | 4.5                 | -68.514       |
| 10     | SRTLSEYKLGASQRVLLSVGGTSNQVAVLY  | 96                  | 4                   | -65.258       |
| 11     | PINLVRDLPQGFSALLLSVGGVASQSIIAY  | 95.8                | 4.2                 | -56.234       |
| 12     | SRTLSEYKLGASQRVLLSVGGGLPFNDGVYF | 95.7                | 4.3                 | -60.258       |
| 13     | PINLVRDLPQGFSALLLSVGGGVYFASTEK  | 100                 | 0                   | -65.994       |
| 14     | SRTLSEYKLGASQRVLLSVGGVASQSIIAY  | 100                 | 0                   | -66.636       |
| 15     | SEYKLGASQRVAGDSLSSVGGAEIRASANL  | 95.8                | 4.2                 | -51.95        |
| 16     | ITRFQTLLALHRSYLLLSVGGTISLAGSYK  | 96                  | 4                   | -52.5         |
| 17     | ITRFQTLLALHRSYLLLSVGGKTFPPTEPK  | 95.7                | 4.3                 | -64.15        |
| 18     | ITRFQTLLALHRSYLLLSVGGTSNQVAVLY  | 92.3                | 7.7                 | -58.35        |
| 19     | SEYKLGASQRVAGDSLSSVGGATSRTLSEY  | 95.8                | 4.2                 | -49.082       |
| 20     | PINLVRDLPQGFSALLLSVGGGLPPAYTNSF | 90.9                | 9.1                 | -71.157       |
| 21     | SRTLSEYKLGASQRVLLSVGGRLFRKSNLK  | 96                  | 4                   | -62.715       |
| 22     | SRTLSEYKLGASQRVLLSVGGGVYFASTEK  | 95.8                | 4.2                 | -65.232       |
| 23     | ITRFQTLLALHRSYLLLSVGGGLPFNDGVYF | 95.8                | 4.2                 | -60.78        |
| 24     | PINLVRDLPQGFSALLLSVGGGLTDEMIAQY | 95.8                | 4.2                 | -63.009       |
| 25     | PINLVRDLPQGFSALLLSVGGGLSYFIASFR | 100                 | 0                   | -58.837       |
| 26     | ITRFQTLLALHRSYLLLSVGGVASQSIIAY  | 100                 | 0                   | -54.92        |
| 27     | SRTLSEYKLGASQRVLLSVGGGLPPAYTNSF | 95.7                | 4.3                 | -66.328       |
| 28     | ITRFQTLLALHRSYLLLSVGGRLFRKSNLK  | 96.2                | 3.8                 | -60.846       |
| 29     | SRTLSEYKLGASQRVLLSVGGGLTDEMIAQY | 100                 | 0                   | -66.41        |
| 30     | SRTLSEYKLGASQRVLLSVGGGLSYFIASFR | 96                  | 4                   | -67.493       |
| 31     | ITRFQTLLALHRSYLLLSVGGGVYFASTEK  | 96                  | 4                   | -59.597       |
| 32     | SEYKLGASQRVAGDSLSSVGGTISLAGSYK  | 91.3                | 8.7                 | -55.281       |
| 33     | SEYKLGASQRVAGDSLSSVGGKTFPPTEPK  | 100                 | 0                   | -53.123       |
| 34     | PINLVRDLPQGFSALLLSVGGWTAGAAAYY  | 95.7                | 4.3                 | -65.343       |

|    |                                |      |     |         |
|----|--------------------------------|------|-----|---------|
| 35 | SYKLGASQVRVAGDSLSSVGGLPFNDGVYF | 95.5 | 4.5 | -49.98  |
| 36 | ITRFQTLALHRSYLLSVGGLPPAYTNSF   | 95.8 | 4.2 | -64.887 |

**Table S6.** HADDOCK results for TLR2-SLP molecular docking (after refinement).

| Complex     | HADDOCK score | Van der Waals energy | Electrostatic energy | Desolvation energy | Restraints violation energy | Buried Surface Area (Å <sup>2</sup> ) |
|-------------|---------------|----------------------|----------------------|--------------------|-----------------------------|---------------------------------------|
| TLR2/Pep 1  | -90.9 ± 0.3   | -56.0 ± 2.5          | -192.9 ± 16.4        | 3.7 ± 2.6          | 0.6 ± 0.2                   | 1343.3 ± 10.2                         |
| TLR2/Pep 2  | -106.4 ± 0.9  | -68.1 ± 1.5          | -186.4 ± 5.0         | -1.1 ± 0.8         | 0.9 ± 0.5                   | 1982.4 ± 33.2                         |
| TLR2/Pep 3  | -85.0 ± 1.9   | -51.8 ± 1.9          | -200.2 ± 23.2        | 6.7 ± 3.6          | 1.6 ± 1.0                   | 1592.2 ± 47.5                         |
| TLR2/Pep 4  | -100.2 ± 1.5  | -41.1 ± 4.2          | -310.4 ± 13.6        | 3.0 ± 1.1          | 0.6 ± 0.2                   | 1597.3 ± 42.7                         |
| TLR2/Pep 5  | -87.9 ± 3.4   | -56.8 ± 2.1          | -135.7 ± 11.5        | -4.0 ± 0.7         | 0.8 ± 0.7                   | 1512.7 ± 42.6                         |
| TLR2/Pep 6  | -125.1 ± 2.7  | -72.0 ± 0.3          | -210.7 ± 6.1         | -11.0 ± 2.4        | 0.8 ± 0.5                   | 1836.8 ± 49.8                         |
| TLR2/Pep 7  | -93.9 ± 1.0   | -66.0 ± 2.5          | -111.3 ± 10.3        | -5.7 ± 1.3         | 0.3 ± 0.1                   | 1657.8 ± 15.5                         |
| TLR2/Pep 8  | -116.0 ± 4.9  | -58.4 ± 2.2          | -289.1 ± 7.5         | 0.2 ± 1.7          | 0.8 ± 0.5                   | 1873.1 ± 47.3                         |
| TLR2/Pep 9  | -113.8 ± 2.8  | -66.9 ± 2.1          | -251.2 ± 2.9         | 3.3 ± 1.7          | 0.8 ± 0.2                   | 1996.9 ± 32.2                         |
| TLR2/Pep 10 | -80.4 ± 2.1   | -57.8 ± 1.8          | -131.3 ± 13.0        | 3.6 ± 3.2          | 1.1 ± 0.6                   | 1527.3 ± 9.3                          |
| TLR2/Pep 11 | -92.5 ± 0.8   | -56.6 ± 2.4          | -193.2 ± 15.1        | 2.6 ± 0.3          | 0.4 ± 0.2                   | 1398.7 ± 12.9                         |
| TLR2/Pep 12 | -122.4 ± 2.1  | -69.4 ± 3.7          | -272.6 ± 8.1         | 1.5 ± 1.5          | 1.0 ± 0.6                   | 1916.3 ± 65.8                         |
| TLR2/Pep 13 | -121.9 ± 1.4  | -59.7 ± 3.9          | -233.3 ± 16.5        | -15.5 ± 1.1        | 0.6 ± 0.4                   | 1921.9 ± 17.7                         |
| TLR2/Pep 14 | -119.3 ± 1.2  | -56.3 ± 1.6          | -375.6 ± 23.6        | 12.0 ± 3.2         | 1.1 ± 0.4                   | 1636.2 ± 37.5                         |
| TLR2/Pep 15 | -107.8 ± 1.3  | -65.7 ± 2.2          | -173.5 ± 8.9         | -7.4 ± 0.4         | 0.6 ± 0.2                   | 1596.7 ± 19.6                         |
| TLR2/Pep 16 | -97.1 ± 2.7   | -57.4 ± 2.2          | -152.4 ± 8.3         | -9.3 ± 1.7         | 0.3 ± 0.1                   | 1563.4 ± 66.3                         |
| TLR2/Pep 17 | -100.4 ± 2.6  | -59.0 ± 2.1          | -231.2 ± 9.8         | 4.8 ± 2.4          | 0.6 ± 0.3                   | 1505.1 ± 29.2                         |
| TLR2/Pep 18 | -90.6 ± 1.1   | -42.9 ± 2.0          | -201.4 ± 13.4        | -7.5 ± 3.0         | 0.3 ± 0.3                   | 1288.0 ± 25.7                         |
| TLR2/Pep 19 | -141.3 ± 2.8  | -59.2 ± 3.0          | -447.4 ± 27.2        | 7.3 ± 2.4          | 0.6 ± 0.7                   | 1849.4 ± 23.8                         |
| TLR2/Pep 20 | -73.5 ± 3.6   | -55.7 ± 3.0          | -93.5 ± 26.8         | 0.8 ± 1.5          | 0.4 ± 0.1                   | 1471.0 ± 18.4                         |
| TLR2/Pep 21 | -101.7 ± 1.7  | -51.6 ± 4.1          | -288.7 ± 26.7        | 7.6 ± 1.2          | 0.6 ± 0.2                   | 1539.9 ± 19.4                         |
| TLR2/Pep 22 | -113.3 ± 1.9  | -48.5 ± 2.7          | -314.0 ± 17.3        | -2.2 ± 1.4         | 1.0 ± 0.6                   | 1647.7 ± 14.7                         |
| TLR2/Pep 23 | -130.7 ± 0.5  | -65.6 ± 5.3          | -216.3 ± 34.2        | -22.0 ± 1.7        | 0.6 ± 0.1                   | 1830.5 ± 54.5                         |
| TLR2/Pep 24 | -102.4 ± 4.9  | -50.8 ± 6.7          | -271.9 ± 32.7        | 2.7 ± 1.2          | 0.5 ± 0.1                   | 1478.8 ± 47.9                         |

|                |              |             |               |             |           |               |
|----------------|--------------|-------------|---------------|-------------|-----------|---------------|
| TLR2/Pep<br>25 | -130.7 ± 1.6 | -76.5 ± 1.0 | -230.0 ± 13.3 | -8.2 ± 2.5  | 0.6 ± 0.3 | 1923.1 ± 34.9 |
| TLR2/Pep<br>26 | -103.4 ± 1.8 | -62.3 ± 4.4 | -152.1 ± 4.0  | -10.8 ± 2.1 | 0.5 ± 0.1 | 1853.0 ± 78.1 |
| TLR2/Pep<br>27 | -110.2 ± 2.8 | -65.1 ± 4.7 | -181.6 ± 11.8 | -8.9 ± 1.6  | 1.1 ± 0.8 | 1623.3 ± 24.9 |
| TLR2/Pep<br>28 | -119.6 ± 2.7 | -47.7 ± 3.2 | -341.8 ± 11.4 | -3.7 ± 1.7  | 0.5 ± 0.4 | 1584.6 ± 39.4 |
| TLR2/Pep<br>29 | -91.3 ± 1.3  | -49.3 ± 2.2 | -221.1 ± 10.3 | 2.1 ± 1.3   | 0.4 ± 0.3 | 1580.4 ± 26.6 |
| TLR2/Pep<br>30 | -126.2 ± 0.8 | -69.0 ± 2.6 | -258.1 ± 13.9 | -5.6 ± 0.6  | 0.6 ± 0.6 | 1915.4 ± 34.8 |
| TLR2/Pep<br>31 | -135.5 ± 3.0 | -63.4 ± 2.7 | -317.5 ± 22.6 | -8.6 ± 1.9  | 0.4 ± 0.2 | 1767.9 ± 32.0 |
| TLR2/Pep<br>32 | -97.9 ± 2.0  | -39.3 ± 4.4 | -284.3 ± 28.9 | -1.8 ± 1.1  | 0.5 ± 0.2 | 1235.6 ± 12.3 |
| TLR2/Pep<br>33 | -110.5 ± 3.1 | -62.2 ± 4.1 | -239.6 ± 17.7 | -0.5 ± 1.7  | 0.7 ± 0.2 | 1769.4 ± 22.4 |
| TLR2/Pep<br>34 | -94.0 ± 2.4  | -63.5 ± 3.2 | -117.9 ± 13.6 | -7.0 ± 1.7  | 0.7 ± 0.4 | 1599.6 ± 52.5 |
| TLR2/Pep<br>35 | -137.3 ± 3.8 | -51.9 ± 3.5 | -471.3 ± 9.2  | 8.8 ± 2.3   | 0.8 ± 0.4 | 1989.9 ± 60.4 |
| TLR2/Pep<br>36 | -98.2 ± 4.3  | -58.6 ± 4.0 | -130.8 ± 12.6 | -13.5 ± 2.0 | 0.7 ± 0.5 | 1495.2 ± 36.6 |

**Table S7.** HADDOCK results for TLR4-SLP molecular docking (after refinement).

| Complex    | HADDOCK<br>score | Van der<br>Waals<br>energy | Electrostatic<br>energy | Desolvation<br>energy | Restraints<br>violation<br>energy | Buried Surface Area<br>(Å <sup>2</sup> ) |
|------------|------------------|----------------------------|-------------------------|-----------------------|-----------------------------------|------------------------------------------|
| TLR4/Pep1  | -87.7 ± 1.2      | -48.2 ± 1.8                | -95.1 ± 12.5            | -20.7 ± 0.6           | 1.8 ± 0.9                         | 1250.5 ± 7.4                             |
| TLR4/Pep2  | -109.9 ± 1.1     | -54.4 ± 2.4                | -154.5 ± 11.4           | -24.8 ± 1.1           | 1.2 ± 0.4                         | 1299.9 ± 30.8                            |
| TLR4/Pep3  | -97.0 ± 0.8      | -60.2 ± 1.5                | -67.1 ± 12.1            | -23.6 ± 1.3           | 2.4 ± 0.9                         | 1349.3 ± 12.0                            |
| TLR4/Pep4  | -90.8 ± 0.7      | -48.9 ± 1.8                | -77.1 ± 9.8             | -26.6 ± 1.0           | 1.0 ± 0.5                         | 1135.0 ± 32.3                            |
| TLR4/Pep5  | -97.3 ± 0.7      | -57.2 ± 2.6                | -110.9 ± 7.8            | -18.0 ± 1.8           | 1.3 ± 0.2                         | 1407.2 ± 25.3                            |
| TLR4/Pep6  | -122.7 ± 1.0     | -64.4 ± 1.6                | -152.7 ± 13.8           | -27.9 ± 1.3           | 1.6 ± 0.4                         | 1422.5 ± 35.7                            |
| TLR4/Pep7  | -113.5 ± 0.5     | -52.7 ± 1.6                | -135.6 ± 9.8            | -33.7 ± 1.1           | 0.9 ± 0.4                         | 1345.7 ± 12.6                            |
| TLR4/Pep8  | -102.8 ± 2.4     | -55.4 ± 2.9                | -137.6 ± 12.6           | -20.0 ± 1.6           | 1.3 ± 0.6                         | 1229.5 ± 17.7                            |
| TLR4/Pep9  | -108.9 ± 3.7     | -56.3 ± 3.5                | -170.6 ± 23.3           | -18.6 ± 1.7           | 1.5 ± 0.5                         | 1378.0 ± 20.9                            |
| TLR4/Pep10 | -98.1 ± 5.9      | -52.7 ± 3.9                | -103.1 ± 19.4           | -25.0 ± 1.1           | 1.8 ± 0.5                         | 1361.8 ± 35.5                            |
| TLR4/Pep11 | -80.8 ± 0.8      | -48.9 ± 1.7                | -82.6 ± 14.1            | -15.5 ± 1.1           | 1.2 ± 0.3                         | 1195.2 ± 37.6                            |
| TLR4/Pep12 | -128.7 ± 1.3     | -59.8 ± 3.9                | -186.9 ± 16.5           | -31.7 ± 2.1           | 1.4 ± 0.3                         | 1421.4 ± 32.2                            |
| TLR4/Pep13 | -112.2 ± 1.4     | -57.5 ± 4.4                | -124.1 ± 14.8           | -30.1 ± 1.5           | 2.0 ± 0.2                         | 1548.8 ± 35.0                            |
| TLR4/Pep14 | -109.9 ± 0.7     | -56.2 ± 0.6                | -173.3 ± 8.7            | -19.1 ± 1.0           | 1.1 ± 0.4                         | 1325.4 ± 27.0                            |
| TLR4/Pep15 | -119.9 ± 5.0     | -55.4 ± 4.5                | -257.3 ± 41.8           | -13.2 ± 2.1           | 1.8 ± 0.2                         | 1409.5 ± 15.0                            |
| TLR4/Pep16 | -109.6 ± 1.6     | -49.0 ± 1.3                | -192.8 ± 10.8           | -22.1 ± 1.0           | 1.2 ± 0.6                         | 1465.0 ± 23.0                            |
| TLR4/Pep17 | -125.2 ± 1.6     | -51.9 ± 2.2                | -224.9 ± 14.0           | -28.5 ± 1.8           | 1.5 ± 0.3                         | 1304.1 ± 34.2                            |
| TLR4/Pep18 | -100.9 ± 0.7     | -52.9 ± 0.3                | -92.0 ± 2.8             | -29.7 ± 0.5           | 1.0 ± 0.2                         | 1321.4 ± 26.2                            |
| TLR4/Pep19 | -129.0 ± 1.5     | -73.1 ± 2.2                | -152.2 ± 9.9            | -25.6 ± 3.2           | 1.2 ± 0.6                         | 1780.1 ± 43.9                            |
| TLR4/Pep20 | -84.0 ± 2.0      | -51.8 ± 1.6                | -56.8 ± 5.2             | -20.9 ± 1.0           | 0.8 ± 0.2                         | 1129.6 ± 36.7                            |
| TLR4/Pep21 | -105.4 ± 2.8     | -54.5 ± 1.0                | -152.8 ± 11.2           | -20.5 ± 2.2           | 2.2 ± 0.9                         | 1347.1 ± 25.0                            |
| TLR4/Pep22 | -108.2 ± 5.2     | -50.3 ± 1.2                | -164.4 ± 23.9           | -25.1 ± 0.9           | 0.8 ± 0.3                         | 1199.0 ± 34.2                            |

|            |              |             |               |             |           |               |
|------------|--------------|-------------|---------------|-------------|-----------|---------------|
| TLR4/Pep23 | -121.8 ± 0.6 | -52.9 ± 1.4 | -155.8 ± 6.3  | -37.8 ± 0.2 | 1.4 ± 0.3 | 1371.0 ± 8.7  |
| TLR4/Pep24 | -95.6 ± 0.5  | -47.3 ± 2.0 | -145.8 ± 12.2 | -19.2 ± 1.6 | 1.4 ± 0.6 | 1169.3 ± 11.8 |
| TLR4/Pep25 | -116.9 ± 1.8 | -67.8 ± 1.8 | -85.3 ± 6.5   | -32.1 ± 1.6 | 1.1 ± 0.4 | 1421.9 ± 24.0 |
| TLR4/Pep26 | -115.6 ± 2.1 | -64.0 ± 2.7 | -39.0 ± 2.2   | -43.9 ± 0.8 | 1.5 ± 0.4 | 1317.9 ± 44.4 |
| TLR4/Pep27 | -107.0 ± 1.6 | -48.9 ± 0.8 | -159.3 ± 11.3 | -26.3 ± 2.2 | 1.1 ± 0.4 | 1271.2 ± 22.1 |
| TLR4/Pep28 | -116.1 ± 0.4 | -59.2 ± 1.1 | -135.0 ± 10.8 | -29.9 ± 1.9 | 0.8 ± 0.3 | 1390.9 ± 19.4 |
| TLR4/Pep29 | -106.5 ± 1.6 | -57.4 ± 2.6 | -122.0 ± 9.4  | -24.8 ± 1.6 | 1.4 ± 0.6 | 1293.1 ± 20.9 |
| TLR4/Pep30 | -113.9 ± 0.5 | -58.1 ± 1.3 | -73.2 ± 11.5  | -41.2 ± 1.2 | 0.9 ± 0.3 | 1301.3 ± 21.1 |
| TLR4/Pep31 | -102.9 ± 0.7 | -42.2 ± 1.9 | -158.9 ± 9.2  | -29.1 ± 1.8 | 1.4 ± 0.7 | 1155.5 ± 15.1 |
| TLR4/Pep32 | -122.0 ± 1.1 | -65.9 ± 0.8 | -186.0 ± 10.0 | -18.9 ± 0.7 | 0.9 ± 0.3 | 1288.1 ± 13.5 |
| TLR4/Pep33 | -120.8 ± 3.1 | -61.0 ± 5.2 | -140.4 ± 16.3 | -31.8 ± 1.3 | 1.4 ± 0.4 | 1368.2 ± 43.1 |
| TLR4/Pep34 | -130.8 ± 4.5 | -69.5 ± 2.6 | -108.3 ± 7.7  | -39.7 ± 1.6 | 1.2 ± 0.5 | 1587.9 ± 38.8 |
| TLR4/Pep35 | -144.2 ± 1.6 | -68.6 ± 2.2 | -242.2 ± 17.9 | -27.4 ± 1.9 | 1.7 ± 0.7 | 1659.2 ± 22.7 |
| TLR4/Pep36 | -105.7 ± 1.8 | -55.7 ± 1.0 | -153.7 ± 14.5 | -19.4 ± 0.7 | 1.5 ± 0.5 | 1369.9 ± 32.4 |

**Table S8.** Predicted  $\Delta G$  and  $K_d$  for the TLR2/4-SLP interactions using PRODIGY.

| Complex    | $\Delta G(\text{kcal/mol})$ | $K_d(\text{M})$ at 37.0 °C | Complex    | $\Delta G(\text{kcal/mol})$ | $K_d(\text{M})$ at 37.0 °C |
|------------|-----------------------------|----------------------------|------------|-----------------------------|----------------------------|
| TLR2/Pep1  | -9.7                        | $1.5 \times 10^{-7}$       | TLR4/Pep1  | -9                          | $4.9 \times 10^{-7}$       |
| TLR2/Pep2  | -12.5                       | $1.6 \times 10^{-9}$       | TLR4/Pep2  | -10.4                       | $4.6 \times 10^{-8}$       |
| TLR2/Pep3  | -11.8                       | $4.6 \times 10^{-9}$       | TLR4/Pep3  | -11.3                       | $1.0 \times 10^{-8}$       |
| TLR2/Pep4  | -10.8                       | $2.3 \times 10^{-8}$       | TLR4/Pep4  | -8.9                        | $5.5 \times 10^{-7}$       |
| TLR2/Pep5  | -12                         | $3.5 \times 10^{-9}$       | TLR4/Pep5  | -11.4                       | $9.1 \times 10^{-9}$       |
| TLR2/Pep6  | -10.9                       | $1.9 \times 10^{-8}$       | TLR4/Pep6  | -10.1                       | $7.3 \times 10^{-8}$       |
| TLR2/Pep7  | -10.7                       | $2.6 \times 10^{-8}$       | TLR4/Pep7  | -9.6                        | $1.7 \times 10^{-7}$       |
| TLR2/Pep8  | -11.5                       | $8.1 \times 10^{-9}$       | TLR4/Pep8  | -10.8                       | $2.5 \times 10^{-8}$       |
| TLR2/Pep9  | -11.7                       | $5.7 \times 10^{-9}$       | TLR4/Pep9  | -9.7                        | $1.4 \times 10^{-7}$       |
| TLR2/Pep10 | -11.2                       | $1.4 \times 10^{-8}$       | TLR4/Pep10 | -9.5                        | $2.1 \times 10^{-7}$       |
| TLR2/Pep11 | -10                         | $8.3 \times 10^{-8}$       | TLR4/Pep11 | -10.8                       | $2.6 \times 10^{-8}$       |
| TLR2/Pep12 | -13                         | $7.1 \times 10^{-10}$      | TLR4/Pep12 | -9.8                        | $1.3 \times 10^{-7}$       |
| TLR2/Pep13 | -12.2                       | $2.5 \times 10^{-9}$       | TLR4/Pep13 | -11.5                       | $7.9 \times 10^{-9}$       |
| TLR2/Pep14 | -11.9                       | $4.0 \times 10^{-9}$       | TLR4/Pep14 | -10.2                       | $6.7 \times 10^{-8}$       |
| TLR2/Pep15 | -12                         | $3.5 \times 10^{-9}$       | TLR4/Pep15 | -10.8                       | $2.5 \times 10^{-8}$       |
| TLR2/Pep16 | -11.6                       | $7.1 \times 10^{-9}$       | TLR4/Pep16 | -9.7                        | $1.4 \times 10^{-7}$       |
| TLR2/Pep17 | -10.9                       | $2.2 \times 10^{-8}$       | TLR4/Pep17 | -9.5                        | $2.1 \times 10^{-7}$       |
| TLR2/Pep18 | -9.9                        | $1.1 \times 10^{-7}$       | TLR4/Pep18 | -10.8                       | $2.4 \times 10^{-8}$       |
| TLR2/Pep19 | -11.6                       | $6.9 \times 10^{-9}$       | TLR4/Pep19 | -12.3                       | $2.2 \times 10^{-9}$       |
| TLR2/Pep20 | -11.2                       | $1.3 \times 10^{-8}$       | TLR4/Pep20 | -9.2                        | $3.1 \times 10^{-7}$       |
| TLR2/Pep21 | -10.8                       | $2.4 \times 10^{-8}$       | TLR4/Pep21 | -10.5                       | $3.7 \times 10^{-8}$       |
| TLR2/Pep22 | -11.1                       | $1.4 \times 10^{-8}$       | TLR4/Pep22 | -10.6                       | $3.4 \times 10^{-8}$       |
| TLR2/Pep23 | -11.8                       | $4.5 \times 10^{-9}$       | TLR4/Pep23 | -9.8                        | $1.1 \times 10^{-7}$       |
| TLR2/Pep24 | -10.4                       | $4.7 \times 10^{-8}$       | TLR4/Pep24 | -9.4                        | $2.2 \times 10^{-7}$       |
| TLR2/Pep25 | -12.8                       | $9.1 \times 10^{-10}$      | TLR4/Pep25 | -12.8                       | $9.1 \times 10^{-10}$      |
| TLR2/Pep26 | -12.3                       | $2.2 \times 10^{-9}$       | TLR4/Pep26 | -9.3                        | $2.7 \times 10^{-7}$       |
| TLR2/Pep27 | -13.3                       | $4.5 \times 10^{-10}$      | TLR4/Pep27 | -10                         | $8.6 \times 10^{-8}$       |
| TLR2/Pep28 | -11.5                       | $7.7 \times 10^{-9}$       | TLR4/Pep28 | -9.7                        | $1.4 \times 10^{-7}$       |
| TLR2/Pep29 | -11.4                       | $9.0 \times 10^{-9}$       | TLR4/Pep29 | -10.7                       | $2.9 \times 10^{-8}$       |
| TLR2/Pep30 | -13.1                       | $6.1 \times 10^{-10}$      | TLR4/Pep30 | -10.6                       | $3.2 \times 10^{-8}$       |
| TLR2/Pep31 | -11.2                       | $1.3 \times 10^{-8}$       | TLR4/Pep31 | -9.2                        | $3.2 \times 10^{-7}$       |
| TLR2/Pep32 | -10.1                       | $8.0 \times 10^{-8}$       | TLR4/Pep32 | -9.7                        | $1.4 \times 10^{-7}$       |
| TLR2/Pep33 | -10.6                       | $3.1 \times 10^{-8}$       | TLR4/Pep33 | -10.1                       | $8.0 \times 10^{-8}$       |

|            |       |                      |            |       |                      |
|------------|-------|----------------------|------------|-------|----------------------|
| TLR2/Pep34 | -12.1 | $2.9 \times 10^{-9}$ | TLR4/Pep34 | -12.5 | $1.5 \times 10^{-9}$ |
| TLR2/Pep35 | -12.5 | $1.6 \times 10^{-9}$ | TLR4/Pep35 | -10.5 | $3.7 \times 10^{-8}$ |
| TLR2/Pep36 | -11   | $1.7 \times 10^{-8}$ | TLR4/Pep36 | -10.7 | $3.1 \times 10^{-8}$ |
